# Supplementary material for: Optimisation of Lactobacillus fermentation conditions and its application in the fermentation of salt-free sauerkraut
Source: Frontiers journal article supplement (doi:10.3389/fmicb.2024.1482163), 2024-10-21
Supplement: Data_Sheet_1.PDF [file Data_Sheet_1.PDF]

## Supplementary Materials for Optimisation of *Lactobacillus* fermentation conditions and its application in the fermentation of salt-free sauerkraut

This PDF file includes: Figure S1

Plackett-Burman experimental design

Path of steepest ascent method

Experiment Results and Analysis of Plackett-Burman (PB), Table S1- Table S4.

Experiment Results and Analysis of Path of steepest ascent, Table S5;

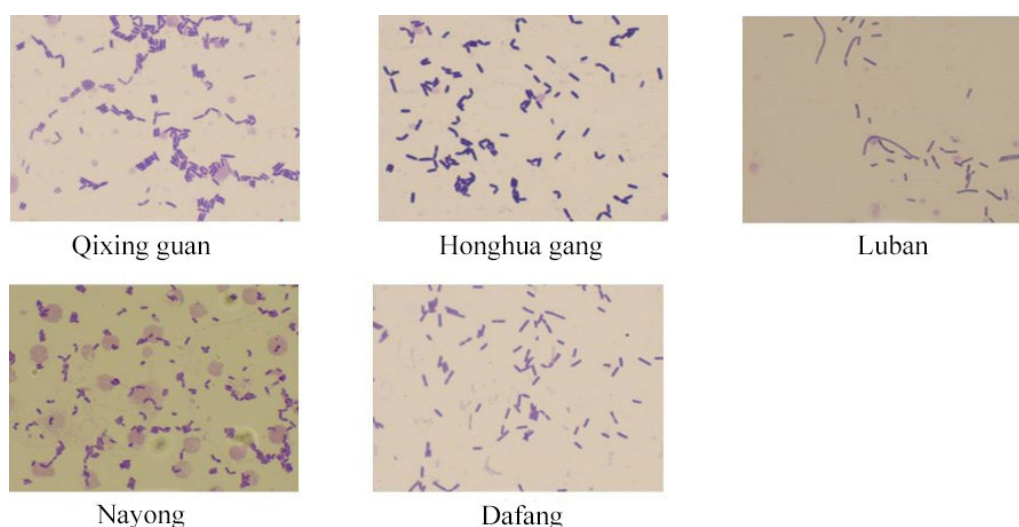

Figure S1 Gram staining and morphology of LAB isolated from the five locations indicated.

### ***Plackett-Burman experimental design***

The effect of culture time, starch/water ratio and inoculum on the yield of LAB cultivated in 100-mL Erlenmeyer flasks, we used single-factor experiments performed in triplicate, using the average LAB yield as the response. Fermentation time for each experiment was two days, and experiments were performed as described previously. A Plackett-Burman experimental design was used for initial screening of the medium and culture conditions for all three components. Each variable was assigned two levels (Table 1): low level (code -1) and high level (code 1). To examine the experimental design, two dummy variables (X4 and X11) were used and fitted into a first-order model.

$$Y = \alpha_0 + \sum \alpha_i X_i \quad (i = 1, 2, \dots, k) \quad (1)$$

where  $Y$  is the estimated target function,  $\alpha_0$  is the model intercept,  $\alpha_i$  is the regression coefficient, and  $X_i$  is the coded independent factor.

**Table S1** Plackett-Burman design to screen the variables

| Variable       | Factor                 | Low level (-1) | High level (1) |
|----------------|------------------------|----------------|----------------|
| $X_1$          | Culture time (h)       | 24             | 72             |
| $X_2$          | Starch/Water ratio (%) | 1              | 2              |
| $X_3$          | Inoculum (%)           | 0.1            | 0.2            |
| $X_4 - X_{11}$ | Dummy variable         | -1             | 1              |

● *Path of steepest ascent method*

Using the findings from the Plackett-Burman experimental design, examination of the optimal level for each chosen factor was performed using the steep ascent approach. Using the direction of the Plackett-Burman experimental value as the upwards inclination, the design of the steep ascent method was established. The adjustment in step size was validated based on the data from the Plackett-Burman experimental design. Whenever the variable effect was positive, higher values were chosen, and viceversa (Table 2).

**Table S2** Steepest ascent experimental design

| Experiment number | Culture time (h) | Starch/Water ratio (%) | Inoculum (%) |
|-------------------|------------------|------------------------|--------------|
| 1                 | 24               | 2.5                    | 0.025        |
| 2                 | 36               | 2.0                    | 0.020        |
| 3                 | 48               | 1.5                    | 0.015        |
| 4                 | 60               | 1.0                    | 0.010        |
| 5                 | 72               | 0.5                    | 0.005        |

**Table S3** Plackett-Burman design and results.

| Run | Culture time (h) | Starch/water ratio (m/V) | Inoculum (V/V) | LAB yield (OD <sub>600</sub> ) |
|-----|------------------|--------------------------|----------------|--------------------------------|
| 1   | 1                | -1                       | 1              | 2.23                           |
| 2   | -1               | 1                        | 1              | 1.09                           |
| 3   | 1                | 1                        | 1              | 1.97                           |

|    |    |    |    |      |
|----|----|----|----|------|
| 4  | -1 | 1  | -1 | 1.42 |
| 5  | 1  | -1 | -1 | 2.55 |
| 6  | -1 | -1 | 1  | 1.49 |
| 7  | 1  | 1  | -1 | 2.18 |
| 8  | 1  | -1 | 1  | 1.79 |
| 9  | -1 | 1  | 1  | 1.06 |
| 10 | 1  | 1  | -1 | 2.09 |
| 11 | -1 | -1 | -1 | 1.92 |
| 12 | -1 | -1 | -1 | 2.01 |

Note: 1OD is equivalent to a LAB concentration of  $1 \times 10^8$  cells/mL

**Table S4 Statistical analysis of Plackett-Burman results.**

| Source                   | Sum of Squares | df | Mean Square | F value | p value |     |
|--------------------------|----------------|----|-------------|---------|---------|-----|
| Model                    | 2.15           | 3  | 0.7166      | 28.30   | 0.0001  | *** |
| A-A (Culture time)       | 1.22           | 1  | 1.22        | 48.03   | 0.0001  | *** |
| B-B (Starch/Water ratio) | 0.3960         | 1  | 0.3960      | 15.64   | 0.0042  | **  |
| C-C (Inoculum)           | 0.5376         | 1  | 0.5376      | 21.23   | 0.0017  | *** |
| Residual                 | 0.2026         | 8  | 0.0253      |         |         |     |
| Lack of Fit              | 0.0972         | 4  | 0.0243      | 0.9228  | 0.5301  |     |
| Pure Error               | 0.1053         | 4  | 0.0263      |         |         |     |
| Cor Total                | 2.35           | 11 |             |         |         |     |

\* =  $p < 0.05$ , \*\* =  $p < 0.01$ , \*\*\* =  $p < 0.001$ , \*\*\*\* =  $p < 0.0001$ .

**Table S5 Design and results of path of steepest ascent method.**

|   | Culture time (h) | Starch/Water ratio (%) | Inoculum (%) | LAB Yield (OD <sub>600</sub> ) |
|---|------------------|------------------------|--------------|--------------------------------|
| 1 | 24               | 2.5                    | 0.025        | 1.88                           |
| 2 | 36               | 2.0                    | 0.020        | 2.23                           |
| 3 | 48               | 1.5                    | 0.015        | 2.84                           |
| 4 | 60               | 1.0                    | 0.010        | 2.16                           |
| 5 | 72               | 0.5                    | 0.005        | 1.63                           |
